# Supplementary material
Source: ML conference proceedings conference paper supplement (https://proceedings.mlr.press/v80/loukas18a.html)
Supplement: Supplementary file 1 [file loukas18a-supp.pdf]

# Spectrally approximating large graphs with smaller graphs: supplementary material

Andreas Loukas and Pierre Vanderghelynst

## 1 Proof of Theorem 4.1

*Proof.* The Courant-Fischer min-max theorem for  $L$  reads

$$\lambda_k = \min_{\dim(U)=k} \max_{x \in \text{span}(U)} \left\{ \frac{x^\top Lx}{x^\top x} \mid x \neq 0 \right\}, \quad (1)$$

whereas the same theorem for  $L_c$  reads

$$\begin{aligned} \tilde{\lambda}_k &= \min_{\dim(U_c)=k} \max_{x_c \in \text{span}(U_c)} \left\{ \frac{x_c^\top L_c x_c}{x_c^\top x_c} \mid x_c \neq 0 \right\} = \min_{\dim(U_c)=k} \max_{C x \in \text{span}(U_c)} \left\{ \frac{x^\top \Pi L \Pi x}{x^\top \Pi x} \mid x \neq 0 \right\} \\ &= \min_{\dim(U)=k, U \subseteq \text{im}(\Pi)} \max_{x \in \text{span}(U)} \left\{ \frac{x^\top Lx}{x^\top x} \mid x \neq 0 \right\}, \end{aligned}$$

where in the second equality we set  $L_c = CLC^\top$  and  $x_c = Cx$  and the third equality holds since  $\Pi$  is a projection matrix (see Property 1). Notice how, with the exception of the constraint that  $x = \Pi x$ , the final optimization problem is identical to the one for  $\lambda_k$ , given in (1). As such, the former's solution must be strictly larger (since it is a more constrained problem) and we have that  $\tilde{\lambda}_k \geq \lambda_k$ .  $\square$

## 2 Proof of Theorem 3.1

We now proceed to derive the main statement of Theorem 3.1. Our approach will be to control  $u_k^\top \tilde{L} u_k$  through its expectation.

**Lemma 2.1.** *For any  $k$  such that  $\lambda_k \leq 0.5 \min_{e_{ij} \in \mathcal{E}} \left\{ \frac{d_i + d_j}{2} + w_{ij} \right\}$  the matrix  $L_c$  produced by REC abides to*

$$P\left(\lambda_k \leq u_k^\top \tilde{L} u_k \leq \lambda_k(1 + \epsilon)\right) \geq 1 - \frac{\vartheta_k(T, \phi)}{4\epsilon}, \quad (2)$$

where

$$\vartheta_k(T, \phi) = \max_{e_{ij} \in \mathcal{E}} \left\{ P(e_{ij} \in \mathcal{E}_F) \frac{d_i + d_j + 2(w_{ij} - \lambda_k)}{w_{ij}} \right\}. \quad (3)$$

*Proof.* Denote by  $\Pi^\perp$  the projection matrix defined such that  $\Pi + \Pi^\perp = I$ . We can then write

$$\begin{aligned} u_k^\top \tilde{L} u_k &= u_k^\top \Pi L \Pi u_k = u_k^\top (I - \Pi^\perp) L (I - \Pi^\perp) u_k = u_k^\top L u_k - 2u_k^\top L \Pi^\perp u_k + u_k^\top \Pi^\perp L \Pi^\perp u_k \\ &= \lambda_k - 2\lambda_k u_k^\top \Pi^\perp u_k + u_k^\top \Pi^\perp L \Pi^\perp u_k \end{aligned} \quad (4)$$

Let us now consider term  $u_k^\top \Pi^\perp L \Pi^\perp u_k$ , where for compactness we set  $y = \Pi^\perp u_k$ .

$$y^\top L y = \sum_{e_{ij} \in \mathcal{E}} w_{ij} (y(i) - y(j))^2 = \underbrace{\sum_{e_{ij} \in \mathcal{E}_F} w_{ij} (y(i) - y(j))^2}_{T_1} + \underbrace{\sum_{v_i \in \mathcal{V}_F} \sum_{v_j \notin \mathcal{V}_F} w_{ij} y(i)^2}_{T_2}. \quad (5)$$

In the last step above, we exploited the fact that  $y(i) = 0$  whenever  $v_i \notin \mathcal{V}_F$ .

Since  $\mathcal{E}_F$  is a matching of  $\mathcal{E}$ , any coarsening that occurs involves a merging of two adjacent vertices  $v_i, v_j$  with  $(\Pi x)(i) = (\Pi x)(j)$ , implying that for every  $e_{ij} \in \mathcal{E}_F$ :

$$(y(i) - y(j))^2 = ((\Pi^\perp u_k)(i) + (\Pi u_k)(i) - (\Pi^\perp u_k)(j) - (\Pi u_k)(j))^2 = (x(i) - x(j))^2$$

and therefore

$$T_1 = \sum_{e_{ij} \in \mathcal{E}} b_{ij} w_{ij} (u_k(i) - u_k(j))^2, \quad (6)$$

with  $b_{ij}$  a Bernoulli random variable indicating whether  $e_{ij} \in \mathcal{E}_F$ . For  $T_2$ , notice that the terms in the sum correspond to boundary edges and, moreover, whenever  $e_{ij} \in \mathcal{E}_F$  all vertices adjacent to  $v_i$  and  $v_j$  do not belong in  $\mathcal{V}_F$ . Another way to express  $T_2$  therefore is

$$\begin{aligned} T_2 &= \sum_{e_{ij} \in \mathcal{E}} b_{ij} \left( y(i)^2 \sum_{e_{i\ell} \in \mathcal{E}, e_{i\ell} \neq e_{ij}} w_{i\ell} + y(j)^2 \sum_{e_{j\ell} \in \mathcal{E}, e_{j\ell} \neq e_{ij}} w_{j\ell} \right) \\ &= \sum_{e_{ij} \in \mathcal{E}} b_{ij} \left( \left( u_k(i) - \frac{u_k(i) + u_k(j)}{2} \right)^2 (d_i - w_{ij}) + \left( u_k(j) - \frac{u_k(i) + u_k(j)}{2} \right)^2 (d_j - w_{ij}) \right) \\ &= \sum_{e_{ij} \in \mathcal{E}} b_{ij} w_{ij} (u_k(i) - u_k(j))^2 \frac{d_i + d_j - 2w_{ij}}{4w_{ij}}. \end{aligned} \quad (7)$$

A similar result also holds for the remaining term  $u_k^\top \Pi^\perp u_k = \|\Pi^\perp u_k\|_2^2$  of (4):

$$\begin{aligned} \|\Pi^\perp u_k\|_2^2 &= \sum_{e_{ij} \in \mathcal{E}} b_{ij} \left( \left( u_k(i) - \frac{u_k(i) + u_k(j)}{2} \right)^2 + \left( u_k(j) - \frac{u_k(i) + u_k(j)}{2} \right)^2 \right) \\ &= \sum_{e_{ij} \in \mathcal{E}} b_{ij} w_{ij} (u_k(i) - u_k(j))^2 \frac{1}{2w_{ij}}. \end{aligned} \quad (8)$$

If we substitute (6), (7), and (8) into (4) we find that

$$\begin{aligned} u_k^\top \tilde{L} u_k - \lambda_k &= \sum_{e_{ij} \in \mathcal{E}} b_{ij} w_{ij} (u_k(i) - u_k(j))^2 \left( 1 + \frac{d_i + d_j - 2w_{ij}}{4w_{ij}} - \frac{\lambda_k}{w_{ij}} \right) \\ &= \frac{1}{4} \sum_{e_{ij} \in \mathcal{E}} b_{ij} w_{ij} (u_k(i) - u_k(j))^2 \left( \frac{d_i + d_j + 2(w_{ij} - 2\lambda_k)}{w_{ij}} \right) \end{aligned} \quad (9)$$

and furthermore

$$\mathbf{E} \left[ u_k^\top \tilde{L} u_k \right] - \lambda_k = \frac{1}{4} \sum_{e_{ij} \in \mathcal{E}} P(e_{ij} \in \mathcal{E}_F) \left( \frac{d_i + d_j + 2(w_{ij} - 2\lambda_k)}{w_{ij}} \right) w_{ij} (u_k(i) - u_k(j))^2. \quad (10)$$

The expression above is always smaller than

$$\mathbf{E} \left[ u_k^\top \tilde{L} u_k \right] - \lambda_k \leq \frac{\lambda_k}{4} \max_{e_{ij} \in \mathcal{E}} \left\{ P(e_{ij} \in \mathcal{E}_F) \frac{d_i + d_j + 2(w_{ij} - 2\lambda_k)}{w_{ij}} \right\} = \frac{\lambda_k}{4} \vartheta_k(T, \phi), \quad (11)$$

where  $\vartheta_k(T, \phi)$  is a function of the sampling probabilities, the eigenvalue  $\lambda_k$ , and the degree distribution of  $G$ . Noticing that (9) is a non-negative random variable whenever  $\lambda_k \leq 0.5 \min_{e_{ij} \in \mathcal{E}} \frac{d_i + d_j}{2} + w_{ij}/2$  (the condition is equivalent to  $d_i + d_j + 2(w_{ij} - 2\lambda_k) > 0$  implying that  $u_k^\top \tilde{L} u_k - \lambda_k$  is a sum of non-negative terms) and using Markov's inequality, we find that

$$P \left( u_k^\top \tilde{L} u_k \geq \lambda_k (1 + \epsilon) \right) = P \left( \frac{u_k^\top \tilde{L} u_k - \lambda_k}{\lambda_k} \geq \epsilon \right) \leq \frac{\mathbf{E} \left[ u_k^\top \tilde{L} u_k \right] - \lambda_k}{\epsilon \lambda_k} \leq \frac{\vartheta_k(T, \phi)}{4\epsilon}, \quad (12)$$

which gives the desired probability bound.  $\square$

The RSS constant therefore depends on the probability that each edge  $e_{ij}$  is contracted. This is given by:

**Lemma 2.2.** *At the termination of REC, each edge  $e_{ij}$  of  $\mathcal{E}$  can be found in  $\mathcal{E}_F$  with probability*

$$p_{ij} \frac{1 - e^{-TP_{ij}}}{P_{ij}} \leq P(e_{ij} \in \mathcal{E}_F) = P(b_{ij} = 1) \leq p_{ij} \frac{1 - e^{-TP_{ij}}}{1 - e^{-P_{ij}}} \quad (13)$$

where  $p_{ij} = \phi_{ij}/\Phi$  and  $P_{ij} = \sum_{e_{pq} \in \mathcal{N}_{ij}} p_{pq}$ .

*Proof.* The event  $X_{ij}(t)$  that edge  $e_{ij}$  is still in the candidate set  $\mathcal{C}$  at the end of the  $t$ -th iteration is

$$\begin{aligned} P(X_{ij}(t)) &= P(X_{ij}(t-1) \cap \{e_{ij} \text{ is not selected at } t\}) \\ &= P(X_{ij}(t-1)) \prod_{pq \in \mathcal{N}_{ij}} (1 - p_{pq}) = \prod_{\tau=1}^t \left( \prod_{pq \in \mathcal{N}_{ij}} (1 - p_{pq}) \right) = a_{ij}^t. \end{aligned} \quad (14)$$

Therefore, the probability that  $e_{ij}$  is selected after  $T$  iterations can be written as

$$\begin{aligned} P(e_{ij} \in \mathcal{E}_F) &= \sum_{t=1}^T P(e_{ij} \text{ is selected at } t) \\ &= \sum_{t=1}^T p_{ij} P(X_{ij}(t-1)) \\ &= p_{ij} \sum_{t=0}^{T-1} a_{ij}^t = p_{ij} \frac{1 - a_{ij}^T}{1 - a_{ij}}. \end{aligned} \quad (15)$$

According to the Weierstrass product inequality

$$a_{ij} = \prod_{e_{pq} \in \mathcal{N}_{ij}} (1 - p_{pq}) \geq 1 - \sum_{e_{pq} \in \mathcal{N}_{ij}} p_{pq} \quad (16)$$

and since the function  $f(x) = (1 - x^T)/(1 - x)$  is monotonically increasing in  $[0, 1]$  and setting  $P_{ij} = \sum_{e_{pq} \in \mathcal{N}_{ij}} p_{pq}$  we have that

$$\frac{1 - a_{ij}^T}{1 - a_{ij}} \geq \frac{1 - (1 - P_{ij})^T}{P_{ij}} = \frac{1 - e^{\log(1 - P_{ij})T}}{P_{ij}} \geq \frac{1 - e^{-TP_{ij}}}{P_{ij}},$$

where the last step takes advantage of the series expansion  $\log(1 - p) = -\sum_{i=1}^{\infty} p^i/i \leq -p$ . Similarly, for the upper bound

$$a_{ij} = \prod_{e_{pq} \in \mathcal{N}_{ij}} (1 - p_{pq}) = e^{\log(\prod_{e_{pq} \in \mathcal{N}_{ij}} (1 - p_{pq}))} = e^{\sum_{e_{pq} \in \mathcal{N}_{ij}} \log(1 - p_{pq})} \leq e^{-\sum_{e_{pq} \in \mathcal{N}_{ij}} p_{pq}} = e^{-P_{ij}} \quad (17)$$

and therefore  $\frac{1 - a_{ij}^T}{1 - a_{ij}} \leq \frac{1 - e^{-TP_{ij}}}{1 - e^{-P_{ij}}}$ , as claimed.  $\square$

Based on Lemma 2.2, the expression of  $\vartheta_k(T, \phi)$  is

$$\begin{aligned} \vartheta_k(T, \phi) &\leq \max_{e_{ij} \in \mathcal{E}} \left\{ p_{ij} \frac{1 - e^{-TP_{ij}}}{1 - e^{-P_{ij}}} \frac{d_i + d_j + 2(w_{ij} - 2\lambda_k)}{w_{ij}} \right\} \\ &\leq \max_{e_{ij} \in \mathcal{E}} \left\{ P_{ij} \frac{1 - e^{-TP_{ij}}}{1 - e^{-P_{ij}}} \right\} \max_{e_{ij} \in \mathcal{E}} \left\{ \frac{p_{ij}}{P_{ij}} \frac{d_i + d_j + 2(w_{ij} - 2\lambda_k)}{w_{ij}} \right\}. \end{aligned} \quad (18)$$

The function  $f(P_{ij}) = P_{ij} \frac{1 - e^{-TP_{ij}}}{1 - e^{-P_{ij}}}$  has a positive derivative in the domain of interest and thus it attains its maximum at  $P_{\max}$  when  $P_{ij}$  is also maximized. Setting  $c_1 = NP_{\max}$  and after straightforward algebraic manipulation, we find:

$$\begin{aligned} \vartheta_k(T, \phi) &\leq P_{\max} \frac{1 - e^{-c_1 T/N}}{1 - e^{-P_{\max}}} \max_{e_{ij} \in \mathcal{E}} \left\{ \frac{p_{ij}}{P_{ij}} \frac{d_i + d_j + 2(w_{ij} - 2\lambda_k)}{w_{ij}} \right\} \\ &= P_{\max} \frac{1 - e^{-c_1 T/N}}{1 - e^{-P_{\max}}} \max_{e_{ij} \in \mathcal{E}} \left\{ \frac{\phi_{ij}}{\sum_{e_{pq} \in \mathcal{N}_{ij}} \phi_{pq}} \left( \frac{\sum_{e_{pq} \in \mathcal{N}_{ij}} w_{pq}}{w_{ij}} + 3 - \frac{4\lambda_k}{w_{ij}} \right) \right\}. \end{aligned} \quad (19)$$

For any potential function and graph such that  $P_{\max} = O(1/N)$ , at the limit  $c_2 = \frac{P_{\max}}{1 - e^{-P_{\max}}} \rightarrow 1$  and the above expression reaches

$$\lim_{N \rightarrow \infty} \vartheta_k(T, \phi) \leq (1 - e^{-c_1 T/N}) \max_{e_{ij} \in \mathcal{E}} \left\{ \frac{\phi_{ij}}{\sum_{e_{pq} \in \mathcal{N}_{ij}} \phi_{pq}} \left( \frac{\sum_{e_{pq} \in \mathcal{N}_{ij}} w_{pq}}{w_{ij}} + 3 - \frac{4\lambda_k}{w_{ij}} \right) \right\}. \quad (20)$$

The final probability estimate is achieved by using Lemma 2.1 along with the derived bound on  $\vartheta_k(T, \phi)$ .

### 3 Proof of Theorem 4.2

We adopt a variational approach and reason that, since

$$\tilde{\lambda}_k = \min_U \max_x \left\{ \frac{x^\top Lx}{x^\top x}, x \in U \text{ and } x \neq 0 \mid \dim(U) = k \mid x = \Pi x \right\}, \quad (21)$$

for any matrix  $Z$  the following inequality holds

$$\tilde{\lambda}_k \leq \max_x \left\{ \frac{x^\top Lx}{x^\top x} \mid x \in \text{span}(Z) \text{ and } x \neq 0 \right\} \quad (22)$$

as long as the columnspan of  $Z$  is of dimension  $k$  and does not intersect with the nullspace of  $\Pi$ .

Write  $\tilde{U}_{k-1}$  to denote the  $n \times (k-1)$  matrix with the  $k-1$  first eigenvectors of  $L_c$  and further set  $Y_{k-1} = C^\top \tilde{U}_{k-1}$ . We will consider the  $N \times k$  matrix  $Z$  with

$$Z(:, i) = \begin{cases} C^\top \tilde{u}_i & \text{if } i < k \\ z & \text{if } i = k, \end{cases} \quad \text{where } z = \Pi(I - Y_{k-1} Y_{k-1}^\top) u_k. \quad (23)$$

It can be confirmed that  $Z$ 's columnspan meets the necessary requirements. Now, we can express any  $x \in \text{span}(Z)$  as  $x = Y_{k-1} a + bz = \Pi(Y_{k-1} a + bz)$  with  $\|a\|^2 + b^2 \|z\|^2 = 1$  and therefore

$$\begin{aligned} x^\top Lx &= (a^\top Y_{k-1}^\top + bz^\top) \Pi L \Pi (Y_{k-1} a + bz) \\ &= (a^\top Y_{k-1}^\top + bz^\top) \tilde{L} (Y_{k-1} a + bz) \\ &= a^\top Y_{k-1}^\top \tilde{L} Y_{k-1} a + b^2 z^\top \tilde{L} z + 2b z^\top \tilde{L} Y_{k-1} a \\ &= a^\top Y_{k-1}^\top \tilde{L} Y_{k-1} a + b^2 z^\top \tilde{L} z, \end{aligned} \quad (24)$$

where in the last step we exploited the fact that, by construction,  $z$  does not lie in the span of  $\tilde{U}_{k-1}$  (matrix  $\tilde{L}$  does not rotate its own eigenvectors). Since  $Y_{k-1} a \in \text{span}(\tilde{U}_{k-1})$ , the first term in the equation above is bounded by  $\tilde{\lambda}_{k-1}$  and the equality is attained only when  $a(k-1) = 1$  (in which case  $b$  must be zero). By the variational argument however, we are certain that the upper bound in (22) has to be at least as large as  $\tilde{\lambda}_{k-1}$ , implying that

$$\tilde{\lambda}_k \leq \max \left\{ \tilde{\lambda}_{k-1}, \frac{z^\top Lz}{z^\top z} \right\} \quad (25)$$

with the two cases corresponding to the choices  $a(k-1) = 1$  and  $b = 1$ , respectively. In addition, we have that

$$z^\top Lz = u_k^\top (I - Y_{k-1} Y_{k-1}^\top) \Pi L \Pi (I - Y_{k-1} Y_{k-1}^\top) u_k = \sum_{i \geq k} \tilde{\lambda}_i (\tilde{u}_i^\top C u_k)^2 \quad (26)$$

and  $\|z\|^2 = \|\Pi(I - Y_{k-1} Y_{k-1}^\top) u_k\|^2 = \sum_{i \geq k} (\tilde{u}_i^\top C u_k)^2$ , meaning that

$$\frac{z^\top \tilde{L} z}{z^\top z} = \frac{\sum_{i \geq k} \tilde{\lambda}_i (\tilde{u}_i^\top C u_k)^2}{\sum_{i \geq k} (\tilde{u}_i^\top C u_k)^2} \leq \frac{u_k^\top \tilde{L} u_k}{u_k^\top C u_k} \quad (27)$$

and therefore the relation  $\tilde{\lambda}_k \leq \max \left\{ \tilde{\lambda}_{k-1}, (1 + \epsilon_k) \frac{\lambda_k}{\sum_{i \geq k} \theta_{ki}} \right\}$  holds whenever  $k \leq K$ .

## 4 Proof of Theorem 4.3

*Proof.* Li's Lemma [2] allows to express  $\vartheta_k$  based on the squared inner products  $(\tilde{u}_j^\top C u_i)^2$  of the eigenvectors  $u_i$  of the Laplacian  $L$  and the lifted eigenvectors  $C^\top \tilde{u}_j$  of the coarsened Laplacian  $L_c$ .

$$\vartheta_k = \left\| \sin \Theta \left( U_k, C^\top \tilde{U}_k \right) \right\|_F^2 = \left\| \tilde{U}_{k^\perp}^\top C U_k \right\|_F^2 = \sum_{i \leq k} \sum_{j > k} (\tilde{u}_j^\top C u_i)^2 \quad (28)$$

Moreover, the summed RSS inequalities for each  $i \leq k$  give:

$$\sum_{i \leq k} (1 + \epsilon_i) \lambda_i \geq \sum_{i \leq k} u_i^\top \tilde{L} u_i = \sum_{i \leq k} \sum_{j=1}^n \tilde{\lambda}_j (\tilde{u}_j^\top C u_i)^2 = \sum_{j \leq k} \tilde{\lambda}_j \sum_{i \leq k} (\tilde{u}_j^\top C u_i)^2 + \sum_{j > k} \tilde{\lambda}_j \sum_{i \leq k} (\tilde{u}_j^\top C u_i)^2. \quad (29)$$

To continue, we use the equality

$$\sum_{2 \leq j \leq k} \sum_{i \leq k} (\tilde{u}_j^\top C u_i)^2 = \sum_{2 \leq i \leq k} \left( \|\Pi u_i\|_2^2 - \sum_{j > k} (\tilde{u}_j^\top C u_i)^2 \right) \quad (30)$$

based on which

$$\tilde{\lambda}_{k+1} \sum_{j > k} \sum_{i \leq k} (\tilde{u}_j^\top C u_i)^2 + \tilde{\lambda}_2 \sum_{2 \leq i \leq k} \left( \|\Pi u_i\|_2^2 - \sum_{j > k} (\tilde{u}_j^\top C u_i)^2 \right) \leq \sum_{i \leq k} (1 + \epsilon_i) \lambda_i = \sum_{2 \leq i \leq k} (1 + \epsilon_i) \lambda_i. \quad (31)$$

Our first  $\sin \Theta$  bound is obtained by using the inequality  $\lambda_2 \leq \tilde{\lambda}_2$  and re-arranging the terms:

$$\left\| \sin \Theta \left( U_k, C^\top \tilde{U}_k \right) \right\|_F^2 \leq \sum_{2 \leq i \leq k} \frac{(1 + \epsilon_i) \lambda_i - \lambda_2 \|\Pi u_i\|_2^2}{\tilde{\lambda}_{k+1} - \lambda_2} \quad (32)$$

For the second bound, we instead perform the following manipulation

$$\begin{aligned} \sum_{j \leq k} \tilde{\lambda}_j \sum_{i \leq k} (\tilde{u}_j^\top C u_i)^2 &\geq \sum_{j \leq k} \lambda_j \sum_{i \leq k} (\tilde{u}_j^\top C u_i)^2 = \sum_{j \leq k} \lambda_j \left( 1 - \sum_{i > k} (\tilde{u}_j^\top C u_i)^2 \right) \\ &\geq \sum_{j \leq k} \lambda_j - \lambda_k \sum_{i \leq k} \left( \|\Pi^\perp u_i\|_2^2 + \sum_{j \geq k} (\tilde{u}_j^\top C u_i)^2 \right), \end{aligned} \quad (33)$$

which together with (28) and (29) results to

$$\left\| \sin \Theta \left( U_k, C^\top \tilde{U}_k \right) \right\|_F^2 \leq \sum_{i \leq k} \frac{(1 + \epsilon_i) \lambda_i - \lambda_i + \lambda_k \|\Pi^\perp u_i\|_2^2}{\tilde{\lambda}_{k+1} - \lambda_k} = \sum_{2 \leq i \leq k} \frac{\epsilon_i \lambda_i + \lambda_k \|\Pi^\perp u_i\|_2^2}{\tilde{\lambda}_{k+1} - \lambda_k}. \quad (34)$$

The final bound is obtained as the minimum of (32) and (34).  $\square$

## 5 Proof of Corollary 5.1

*Proof.* The proof follows a known argument in the analysis of spectral clustering first proposed by Boutsidis [1] and later adapted by Martin et al. [3]. In particular, these works proved that:

$$\mathcal{F}_K(\Psi, \tilde{S}^*)^{1/2} \leq \mathcal{F}_K(\Psi, S^*)^{1/2} + 2\gamma_K, \quad (35)$$

with  $\gamma_K = \|\Psi - \tilde{\Psi}Q\|_F = \|U_K - C^\top \tilde{U}_K Q\|_F$  and  $Q$  being some unitary matrix of appropriate dimensions. However, as demonstrated by Yu and coauthors [4], it is always possible to find a unitary matrix  $Q$  such that

$$\gamma_K^2 = \|U_K - C^\top \tilde{U}_K Q\|_F^2 \leq 2 \left\| \sin \Theta(U_K, C^\top \tilde{U}_K) \right\|_F^2 \leq 2 \sum_{k=2}^K \frac{\epsilon_k \lambda_k + \lambda_K \|\Pi^\perp u_k\|_2^2}{\delta_K} \quad (36)$$

where the last inequality follows from Theorem 4.3 and  $\tilde{\lambda}_{K+1} \geq \lambda_{K+1}$ . At this point, we could opt to take a union bound with respect to the events  $\{\epsilon_k \geq \epsilon\}$  and  $\{\|\Pi^\perp u_k\|_2^2 \geq \epsilon\}$  using the results of Section 3. A more careful analysis however follows the steps of the proof of Theorem 3.1 simultaneously for all terms:

$$\begin{aligned} \sum_{k=2}^K \mathbf{E}[\epsilon_k] \lambda_k + \lambda_K \mathbf{E}[\|\Pi^\perp u_k\|_2^2] &= \sum_{k=2}^K \sum_{e_{ij} \in \mathcal{E}} P(e_{ij} \in \mathcal{E}_F) w_{ij} (u_k(i) - u_k(j))^2 \left[ \frac{d_i + d_j + 2w_{ij} + 2\lambda_K - 4\lambda_k}{4w_{ij}} \right] \\ &\leq \sum_{k=2}^K \lambda_k \max_{e_{ij} \in \mathcal{E}} \left\{ P(e_{ij} \in \mathcal{E}_F) \left[ \frac{d_i + d_j + 2w_{ij} + 2\lambda_K - 4\lambda_k}{4w_{ij}} \right] \right\} \\ &\leq \sum_{k=2}^K \lambda_k P_{\max} \frac{1 - e^{-TP_{\max}}}{1 - e^{-P_{\max}}} \max_{e_{ij} \in \mathcal{E}} \left\{ \frac{\phi_{ij}}{\sum_{e_{pq} \in \mathcal{N}_{ij}} \phi_{pq}} \left( \frac{\sum_{e_{pq} \in \mathcal{N}_{ij}} w_{pq}}{w_{ij}} + 3 + \frac{2\lambda_K - 4\lambda_k}{w_{ij}} \right) \right\} \\ &= c_2 \frac{1 - e^{-c_1 T/N}}{4} \sum_{k=2}^K \lambda_k \max_{e_{ij} \in \mathcal{E}} \left\{ \frac{\phi_{ij}}{\sum_{e_{pq} \in \mathcal{N}_{ij}} \phi_{pq}} \left( \frac{\sum_{e_{pq} \in \mathcal{N}_{ij}} w_{pq}}{w_{ij}} + 3 + \frac{2\lambda_K - 4\lambda_k}{w_{ij}} \right) \right\}, \quad (37) \end{aligned}$$

where as before  $c_1 = NP_{\max}$  and  $c_2 = P_{\max}/(1 - e^{-P_{\max}})$ . Assuming further that a heavy-edge potential is used,  $N$  is sufficiently large, and  $G$  has bounded degree such that  $c_1 = 4\varrho_{\max} = O(1)$ , the above simplifies to

$$\begin{aligned} \mathbf{E}[\gamma_K^2] &\leq \frac{1 - e^{-4\varrho_{\max} T/N}}{2\delta_K} \sum_{k=2}^K \lambda_k \left( 1 + \max_{e_{ij} \in \mathcal{E}} \left\{ \frac{3w_{ij} + 2\lambda_K - 4\lambda_k}{\sum_{e_{pq} \in \mathcal{N}_{ij}} w_{pq}} \right\} \right) \\ &\leq \frac{1 - e^{-4\varrho_{\max} T/N}}{2\delta_K} \sum_{k=2}^K \lambda_k \left( 1 + \max_{e_{ij} \in \mathcal{E}} \left\{ \frac{6 + 4\lambda_K - 8\lambda_k}{d_{\text{avg}} \varrho_{\min}} \right\} \right). \quad (38) \end{aligned}$$

The last inequality used the relation  $\min_{e_{ij}} \sum_{e_{pq} \in \mathcal{N}_{ij}} w_{pq} = \varrho_{\min} d_{\text{avg}}/2$  and the fact that  $w_{ij} \leq 1$ . Setting  $c_3 = \frac{\sum_{k=2}^K \lambda_k^2}{\sum_{k=2}^K \lambda_k}$ , gives

$$\mathbf{E}[\gamma_K^2] \leq \frac{1 - e^{-4\varrho_{\max} T/N}}{2\delta_K} \left( \sum_{k=2}^K \lambda_k \right) \left( 1 + \frac{6 + 4\lambda_K - 8c_3}{d_{\text{avg}} \varrho_{\min}} \right). \quad (39)$$

From Markov's inequality, then

$$P \left( \left[ \mathcal{F}_K(\Psi, \tilde{S}^*)^{1/2} - \mathcal{F}_K(\Psi, S^*)^{1/2} \right]^2 \geq \epsilon \sum_{k=2}^K \frac{2\lambda_k (1 - e^{-4\varrho_{\max} T/N})}{\delta_K} \right) \leq \frac{1}{\epsilon} \left( 1 + \frac{6 + 4\lambda_K - 8c_3}{d_{\text{avg}} \varrho_{\min}} \right). \quad (40)$$

The final result follows by the inequality  $1 - e^{-4\varrho_{\max} T/N} \leq 4r\varrho_{\max}$  (see (9) in the main document).  $\square$

## 6 The MNIST digit graph

The following figure illustrates an instance of the clustering problem we considered. The graph is constructed from  $N = 1000$  images, each depicting a digit between 0 and 4 from the MNIST database. Contracted edges are shown in red.

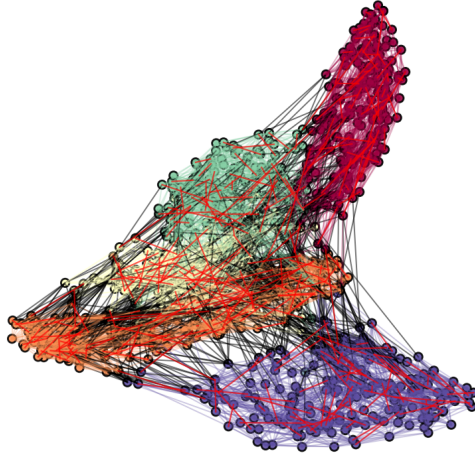

## References

- [1] C. Boutsidis, P. Kambadur, and A. Gittens. Spectral clustering via the power method-provably. In *International Conference on Machine Learning*, pages 40–48, 2015.
- [2] R.-C. Li. Relative perturbation theory:(ii) eigenspace variations. Technical report, 1994.
- [3] L. Martin, A. Loukas, and P. Vandergheynst. Fast approximate spectral clustering for dynamic networks. *arXiv preprint arXiv:1706.03591*, 2017.
- [4] Y. Yu, T. Wang, and R. J. Samworth. A useful variant of the davis–kahan theorem for statisticians. *Biometrika*, 102(2):315–323, 2014.
